## VOCAL TRACT ALLOMETRY IN A MAMMALIAN VOCAL LEARNER

Koen de Reus<sup>1,2,3\*#</sup>, Daryll Carlson<sup>3,4\*</sup>, Alice Lowry<sup>3,5</sup>, Stephanie Gross<sup>6</sup>, Maxime Garcia<sup>7,8</sup>, Ana Rubio-Garcia<sup>3</sup>, Anna Salazar-Casals<sup>3</sup>, Andrea Ravignani<sup>1,3#</sup>

<sup>1</sup>Comparative Bioacoustics Group, Max Planck Institute for Psycholinguistics, Nijmegen, the Netherlands

<sup>2</sup>Artificial Intelligence Lab, Vrije Universiteit Brussel, Brussels, Belgium

<sup>3</sup>Research Department, Sealcentre Pieterburen, Pieterburen, the Netherlands

<sup>4</sup>Department of Earth System Science, Stanford University, Stanford, USA

<sup>5</sup>School of Environmental Sciences, University of Liverpool, Liverpool, United Kingdom

<sup>6</sup>Institute for Terrestrial and Aquatic Wildlife Research (ITAW), University of Veterinary Medicine Hannover, Foundation, BÜsum, Germany

<sup>7</sup>Animal Behaviour, Department of Evolutionary Biology and Environmental Studies, University of Zurich, Zürich, Switzerland

<sup>8</sup>Center for the Interdisciplinary Study of Language Evolution, University of Zurich, Zürich, Switzerland

\* These authors share joint first authorship.

# Corresponding Authors: [kdereus95@gmail.com](mailto:kdereus95@gmail.com); [andrea.ravignani@mpi.nl](mailto:andrea.ravignani@mpi.nl)

### **Abstract**

Acoustic allometry occurs when features of animal vocalisations can be predicted from body size measurements. Despite this being considered the norm, allometry sometimes breaks, resulting in species sounding smaller or larger than expected. A recent hypothesis suggests that allometry-breaking animals cluster into two groups: those with anatomical adaptations to their vocal tracts and those capable of learning new sounds (vocal learners). Here we test this hypothesis by probing vocal tract allometry in a proven mammalian vocal learner, the harbour seal (*Phoca vitulina*). We test whether vocal tract structures and body size scale allometrically in 68 individuals. We find that both body length and body weight accurately predict vocal tract length and one tracheal dimension. Independently, body length predicts vocal fold length while body weight predicts a second tracheal dimension. All vocal tract measures are larger in weaners than in pups and some structures are sexually dimorphic within age classes. We conclude that harbour seals do comply with allometric constraints, lending support to our hypothesis. However, allometry between body size and vocal fold length seems to emerge after puppyhood, suggesting that ontogeny may modulate the anatomy-learning distinction previously hypothesised as clear-cut. Species capable of producing non-allometric signals while their vocal tract scales allometrically, like seals, may then use non-morphological allometry-breaking mechanisms. We suggest that seals, and potentially other vocal learning mammals, may achieve allometry-breaking through developed neural control over their vocal organs.

**Key words:** pinniped, harbour seal, vocal anatomy, acoustic allometry, trachea, larynx, vocal tract

42 **Introduction**

43 In many species, acoustic signals help mediate social interactions among individuals such as competition  
44 for mates and territory, and parent-offspring recognition (Bradbury & Vehrencamp, 1998; Martin, Tucker,  
45 & Rogers, 2017). Signals can encode information about the caller's biology which can be readily  
46 deciphered by the receiver, including age (Reby & McComb, 2003; Charlton, Zhihe, & Snyder, 2009),  
47 sex (Vignal & Kelley, 2007; Charlton et al., 2009), body size (Fitch, 1997; Charlton et al., 2009; Charlton  
48 et al., 2011, Garcia, Wondrak, Huber, & Fitch, 2016), hormone levels (Koren & Geffen, 2009), and  
49 physical condition (Wyman, Mooring, McCowan, Penedo, & Hart, 2008; Koren & Geffen, 2009).

50  
51 In particular, body size often shapes mammalian sounds by constraining the geometry of the vocal tract  
52 (Fitch, 2000; Reby & McComb, 2003). Acoustic cues relating to the body size of the caller can inform the  
53 receiver about the caller's competitive ability and reproductive success (Poole, 1999; Reby & McComb,  
54 2003; Kuester, Paul, & Arnemann, 1995; Pfefferle & Fischer, 2006). For example, in primates and  
55 carnivores, there is an inverse relationship between body size and the call frequency parameters, where  
56 larger animals produce calls with lower frequencies, i.e., have a 'deeper' voice (Bowling et al., 2017).  
57 This relationship between acoustical call features and their accurate reflection of body size is known as  
58 'acoustic allometry' (Taylor & Reby, 2010; Fitch, 1997). Here, signalling is considered *honest* when the  
59 acoustic parameters of observed vocalisations accurately reflect an individual's body size (Fitch &  
60 Hauser, 2003). Deviations from allometry can generate *dishonest* signals, with animals sounding  
61 unexpectedly small or large for their body size (Garcia & Ravignani, 2020). Dishonest signals may be  
62 produced when an animal has a non-allometric vocal tract, or enhanced control over their vocal organs  
63 which allows them to learn or modify existing vocalisations: an ability known as 'vocal learning'. Recent  
64 cross-species work indeed showed that, given a cross-species regression between sounds produced and  
65 body size, outlier species seem to cluster either on one side of the line – those with anatomical adaptations  
66 – or on the other – the vocal learners. This led to a morphology vs. learning hypothesis (Garcia &  
67 Ravignani, 2020; Ravignani & Garcia, 2021): dishonest signals in mammals may arise either from  
68 anatomical adaptations or vocal learning capacities. This prediction has the potential to identify new vocal  
69 learners or species with unexpected vocal tract morphology. Vocal learners should therefore violate  
70 acoustic allometry while possessing an allometric vocal tract. For the first time, we test this prediction,  
71 asking whether vocal tract allometry or a deviation thereof occurs in a vocal learning species which is  
72 known to violate acoustic allometry. We do this in harbour seals, a pinniped rapidly becoming a model  
73 species for studying mammalian vocal learning.

74

75 Pinnipeds are a group of semi-aquatic mammals, with many species exhibiting marked vocal flexibility  
76 (Bowen, 1991; Ravignani et al., 2016). Harbour seals are among the few pinnipeds showing vocal  
77 learning abilities (Bjørge, Desportes, Waring, & Rosing-Asvid, 2010; Ralls, Fiorelli, & Gish, 1985;  
78 Borda, Jadoul, Rasilo, Salazar-Casals, & Ravignani, in press). They are particularly vocal during the first  
79 few weeks following birth (Perry & Renouf, 1988). Harbour seal pups produce individually distinctive  
80 mother attraction calls (Renouf, 1984) which vary with age, sex, and body length (Khan, Markowitz, &  
81 McCowan, 2006; Sauvé, Beauplet, Hammill, & Charrier, 2015). After weaning, however, these calls  
82 disappear entirely from their vocal repertoire, with most vocalisations ceasing aside from occasional  
83 clicks and growls (Renouf, 1984). During adulthood, female harbour seals remain almost entirely vocally  
84 inactive (Van Parijs & Kovacs, 2002), but males start vocalising again, producing underwater calls during  
85 the mating season (Hanggi & Schusterman, 1994). The large variation in vocal repertoire observed across  
86 individuals, sexes, and age classes makes harbour seals ideal candidates to test the morphology vs.  
87 learning hypothesis, i.e., whether a vocal learning mammal does indeed escape acoustic allometry via  
88 learning instead of via anatomical adaptations.

89  
90 Most mammalian vocalizations are described via the source-filter theory of vocal production. Within this  
91 framework, vocal signals are initially produced by a *source* and are then *filtered* by the vocal tract before  
92 being released into the environment (Fant, 1970). In mammals, the source of sound production is the  
93 larynx, and the filter is composed of the cavities making up the supralaryngeal vocal tract (Fant, 1970)  
94 (see Figure 1A). The vocal folds in the larynx are shelves of tissue lying across the airway that attach  
95 ventrally and laterally to the thyroid cartilage and dorsally to the arytenoid cartilage (see Figure 1B).  
96 When vocalising, the air expelled from the lungs rushes between the vocal folds, causing vibration of  
97 their edges and producing sound (Reidenberg & Laitman, 2010). The sound then continues to propagate  
98 along the supralaryngeal vocal tract, being filtered by its geometry, and is finally released as vocalisation.  
99 The source-filter framework highlights which vocal tract structures determine specific features present in  
100 acoustic signals. The rate of vibration of the vocal folds determines the fundamental frequency (F0) and  
101 the cavities of the vocal tract determine formant frequencies (Taylor & Reby, 2010). Measurements of  
102 these vocal tract structures can thus be used to estimate the acoustic features of vocalisations.

103

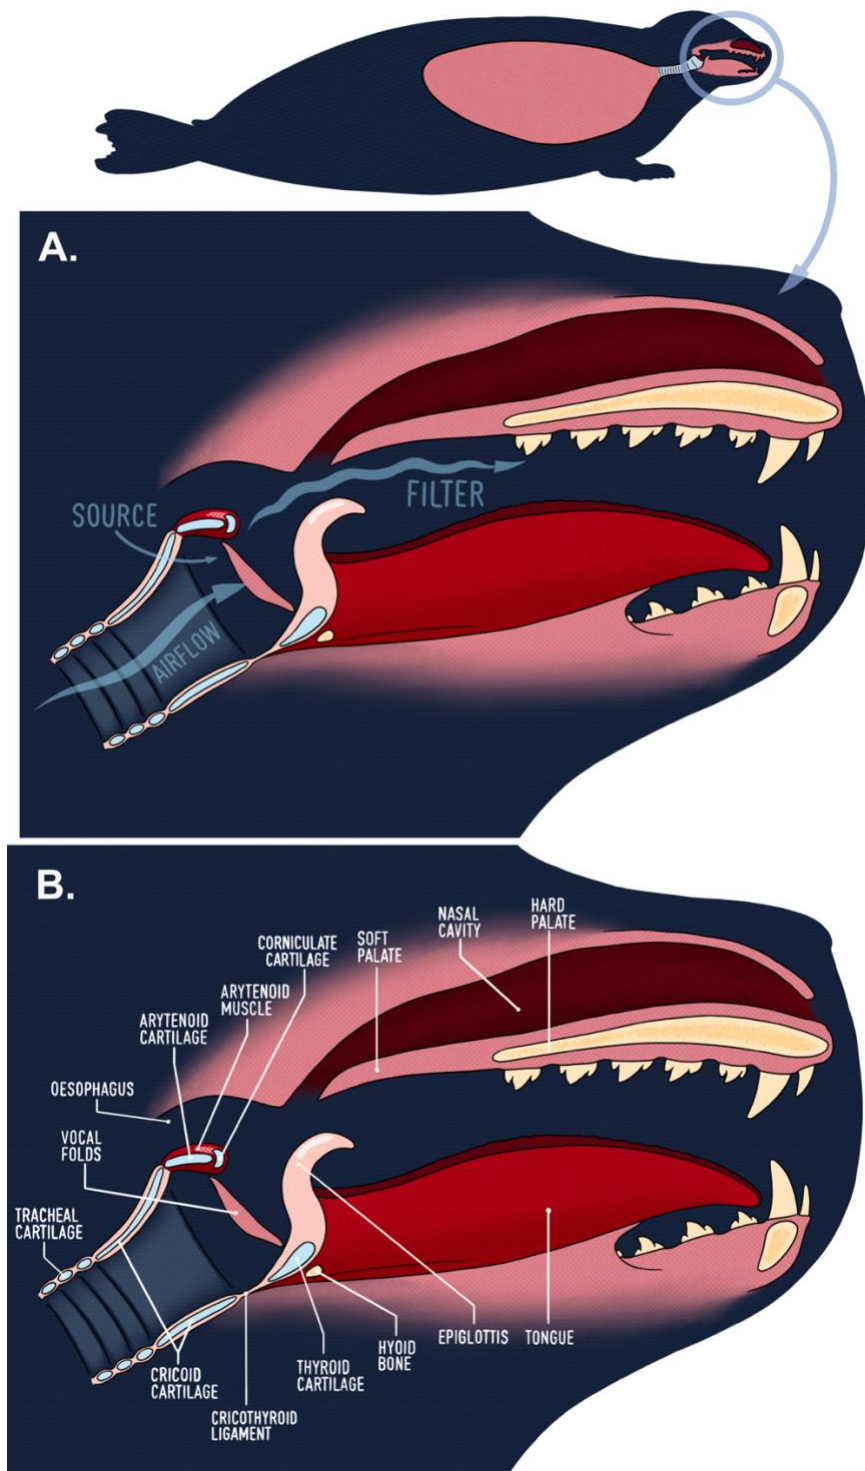

104  
105  
106  
107  
108

**Figure 1.** Vocal anatomy of the harbour seal. Panel A illustrates the source-filter theory of sound production. Panel B shows the main anatomical structures making up the vocal tract.

109

110 Bioacoustics studies often investigate allometric relationships between acoustic signal features and body  
111 size, without consideration of the underlying allometric scaling between body size and vocal anatomy.  
112 Mammals often show allometry between body size and upper vocal tract length because the upper vocal  
113 tract is constrained by bony structures (Fitch, 1997; Fitch & Giedd, 1999; Fitch, 2000; Plotsky, Rendall,  
114 Riede, & Chase, 2013; Garcia et al., 2016). However, allometry between body size and the size of the  
115 vocal folds is less common: the larynx is surrounded by cartilaginous structures and is thus less  
116 constrained, suggesting that vocal fold length can be decoupled from overall body size, as found in  
117 nonhuman primates (Fitch & Hauser, 1995; Fitch, 1997; Garcia, Herbst, Bowling, Dunn, & Fitch, 2017).  
118 In mammals, formants, the acoustic proxy of vocal tract length, are thus a stronger body size predictor  
119 than F<sub>0</sub>, the acoustic proxy of vocal fold length (Fitch, 1997; Garcia et al., 2016). These findings indicate  
120 that, if animals do not have particular anatomical adaptations, their upper vocal tract should scale with  
121 body size, but their vocal folds should not.

122

123 Within the larger framework of the hypothesis above, this study tests for allometric relationships between  
124 body size and vocal anatomy measurements in young harbour seals and tests how these relationships vary  
125 with sex and age. Preliminary work found that harbour seals' body length correlates with upper vocal  
126 tract length and tracheal diameter, but not with vocal fold length (Ravignani et al., 2017). Here, we aim to  
127 expand on these findings by using a larger sample size (353% increase), adding refined anatomical  
128 measurements, and comparing different age classes (to test for developmental effects). Based on previous  
129 literature, we expect to find allometry between body size and vocal tract structures that are surrounded -  
130 and hence constrained - by bony structures, such as vocal tract length. However, based on harbour seals'  
131 vocal learning abilities (Janik & Slater, 1997), we expect their vocal flexibility to offer favourable  
132 grounds to find deviations from body size allometry for vocal tract components surrounded by cartilage,  
133 such as the trachea and vocal fold length.

134

135

136

137 **Results**

138 Inter-rater reliability for VTL, VFL, VFT, and both STDVs was evaluated using Pearson correlations.  
139 VTL ( $r = 0.94$ ), VFL ( $r = 0.88$ ), STDV1 ( $r = 0.97$ ) and STDV2 ( $r = 0.93$ ) showed high inter-rater  
140 reliability. VFT ( $r = 0.59$ ) showed lower inter-rater reliability and was consequently excluded from  
141 further analysis. All correlations were significant at  $p < 0.001$ .

142  
143 All Spearman correlations between body size and vocal anatomy measurements showed positive  
144 relationships and significance at the 0.05 level (see Table 1). There were high correlations between  
145 weight and length ( $r_s = 0.70$ ), and between weight and girth ( $r_s = 0.86$ ). Other notable correlations  
146 included those between VTL and VFL ( $r_s = 0.72$ ), VTL and STDV1 ( $r_s = 0.70$ ), VFL and STDV1 ( $r_s =$   
147  $0.82$ ), VFL and STDV2 ( $r_s = 0.76$ ). Spearman correlations for pups and weaners can be found in Tables  
148 2-3 of the Supplement.

149  
150 Table 1  
151 *Pairwise Spearman correlations*

152

| Variable    | Length<br>(cm) | Weight<br>(kg) | Girth<br>(cm) | VTL<br>(mm) | VFL<br>(mm) | VFT<br>(mm) | STDV1<br>(mm) |
|-------------|----------------|----------------|---------------|-------------|-------------|-------------|---------------|
| Weight (kg) | 0.70           |                |               |             |             |             |               |
| Girth (cm)  | 0.53           | 0.86           |               |             |             |             |               |
| VTL (mm)    | 0.62           | 0.69           | 0.63          |             |             |             |               |
| VFL (mm)    | 0.73           | 0.79           | 0.65          | 0.72        |             |             |               |
| VFT (mm)    | 0.44           | 0.67           | 0.68          | 0.52        | 0.60        |             |               |
| STDV1 (mm)  | 0.63           | 0.78           | 0.65          | 0.70        | 0.82        | 0.69        |               |
| STDV2 (mm)  | 0.58           | 0.72           | 0.62          | 0.67        | 0.76        | 0.60        | 0.81          |

153  
154 *Note.* All correlations were significant at  $p < 0.05$  after correcting for multiple comparisons using the  
155 Holm-Bonferroni method.

156

157 All anatomical measurements were non-normally distributed but showed equal variances across age and  
158 sex groups. A Mann Whitney U-test was used to test for group differences in both variables as only the  
159 assumption for homogeneity of variance was satisfied. All anatomical measurements were significantly  
160 larger in weaners than in pups ( $p < 0.001$ ; see Table 2 and Figure 3). No significant sex differences were  
161 found when considering pups and weaners together ( $p > 0.05$ ). When considering pups alone, both the  
162 normality and homoscedasticity assumptions were met. A two-tailed independent samples t-test found  
163 significant sex differences for vocal tract length ( $t = -3.416$ ,  $p < 0.05$ ; see Figure 4A). Male pups (86.03  
164 mm  $\pm$  2.92) had a larger mean VTL than females (79.80 mm  $\pm$  3.68). When considering weaners alone,  
165 variables showed non-normal distribution, but equal variances. A series of Mann Whitney U-tests found  
166 that only the first subglottic-tracheal dorsoventral distance was significantly different across sexes ( $U =$   
167 218,  $p < 0.05$ ; see Figure 4B). Weaned males (25.12 mm  $\pm$  1.50) had a wider mean STDV1 compared to  
168 weaned females (24.22 mm  $\pm$  1.24).

169

170 Table 2

171 *Means and standard deviations*

172

| Variable    | All   |      | Pups  |      | Weaners |      |
|-------------|-------|------|-------|------|---------|------|
|             | Mean  | SD   | Mean  | SD   | Mean    | SD   |
| Length (cm) | 88.07 | 8.03 | 79.86 | 4.79 | 90.19   | 7.32 |
| Weight (kg) | 14.53 | 3.92 | 9.81  | 1.46 | 15.75   | 3.39 |
| Girth (cm)  | 57.55 | 9.62 | 46.54 | 5.66 | 60.41   | 8.30 |
| VTL (mm)    | 91.43 | 6.77 | 83.36 | 4.48 | 93.53   | 5.60 |
| VFL (mm)    | 10.92 | 1.16 | 9.26  | 0.90 | 11.35   | 0.77 |
| VFT (mm)    | 5.15  | 0.61 | 4.50  | 0.43 | 5.35    | 0.51 |
| STDV1 (mm)  | 23.97 | 1.95 | 21.35 | 1.37 | 24.65   | 1.43 |
| STDV2 (mm)  | 17.43 | 1.82 | 15.17 | 1.04 | 18.02   | 1.49 |

173

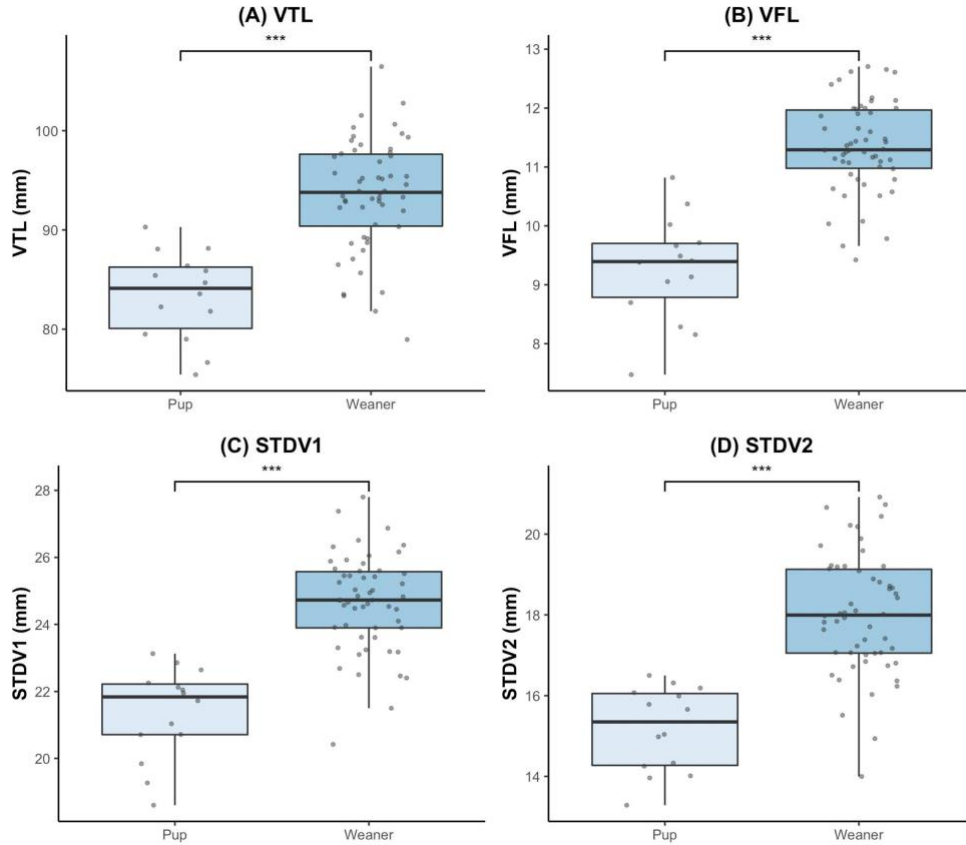

174  
175  
176  
177  
178  
179

**Figure 3.** Boxplots illustrating the significant age differences between pups and weaners for (A) VTL, (B) VFL, (C) STDV1, and (D) STDV2. The level of significance is denoted by asterisks, where \*\*\* = 0.001.

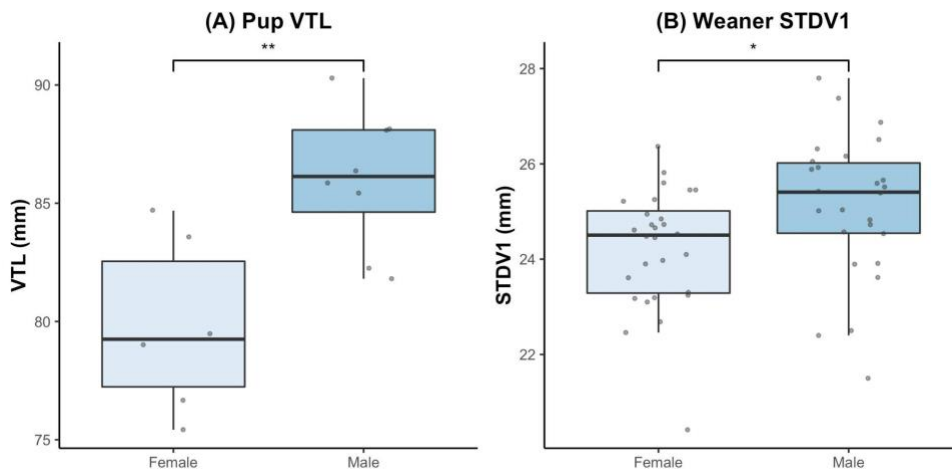

180  
181  
182

**Figure 4.** Boxplots illustrating the significant sex differences for (A) VTL in pups and (B) STDV1 in weaners. The level of significance is denoted by asterisks, where \* = 0.05 and \*\* = 0.01.



183

184 A reduced GLM, obtained by stepwise regression based on AIC values, was produced for every vocal  
185 tract measurement with high inter-rater reliability, including VTL, VFL, STDV1 and STDV2. All VIF  
186 scores were lower than 5 suggesting that multicollinearity was not problematic in the selected models. All  
187 model assumptions were satisfied. Moreover, ANOVA testing indicated that the reduced models did not  
188 perform significantly worse than the full models ( $p > 0.90$ ). GLM results showed that most vocal tract  
189 dimensions were best explained by length, weight, age, and sex (see Table 3). Girth was not retained as a  
190 predictor term in any of the selected models. For each model, the predictor estimates with their  
191 confidence intervals can be found in Tables 4-7 of the Supplement and plots of the predicted effects can  
192 be found in Figures 1-5 of the same document. Significant interaction effects are shown in Figure 5.

193

194 Table 3

195 *Selected models for each vocal tract structure*

| Measurement | Selected model                                                                    | Deviance explained (%) |
|-------------|-----------------------------------------------------------------------------------|------------------------|
| VTL         | $\underline{L} + \underline{W} + \underline{A} + \underline{S} + \underline{L*S}$ | 59.30                  |
| VFL         | $\underline{L} + W + A + \underline{S} + A*W + \underline{A*S}$                   | 74.89                  |
| STDV1       | $\underline{L} + \underline{W} + \underline{A} + \underline{S}$                   | 69.99                  |
| STDV2       | $L + \underline{W} + \underline{A} + S$                                           | 58.38                  |

196 *Note.* Models included the predictors length (L), weight (W), age class (A) and sex (S). Predictor terms  
197 joined by an asterisk denote an interaction effect. Significant predictor terms are shown as underlined.

198

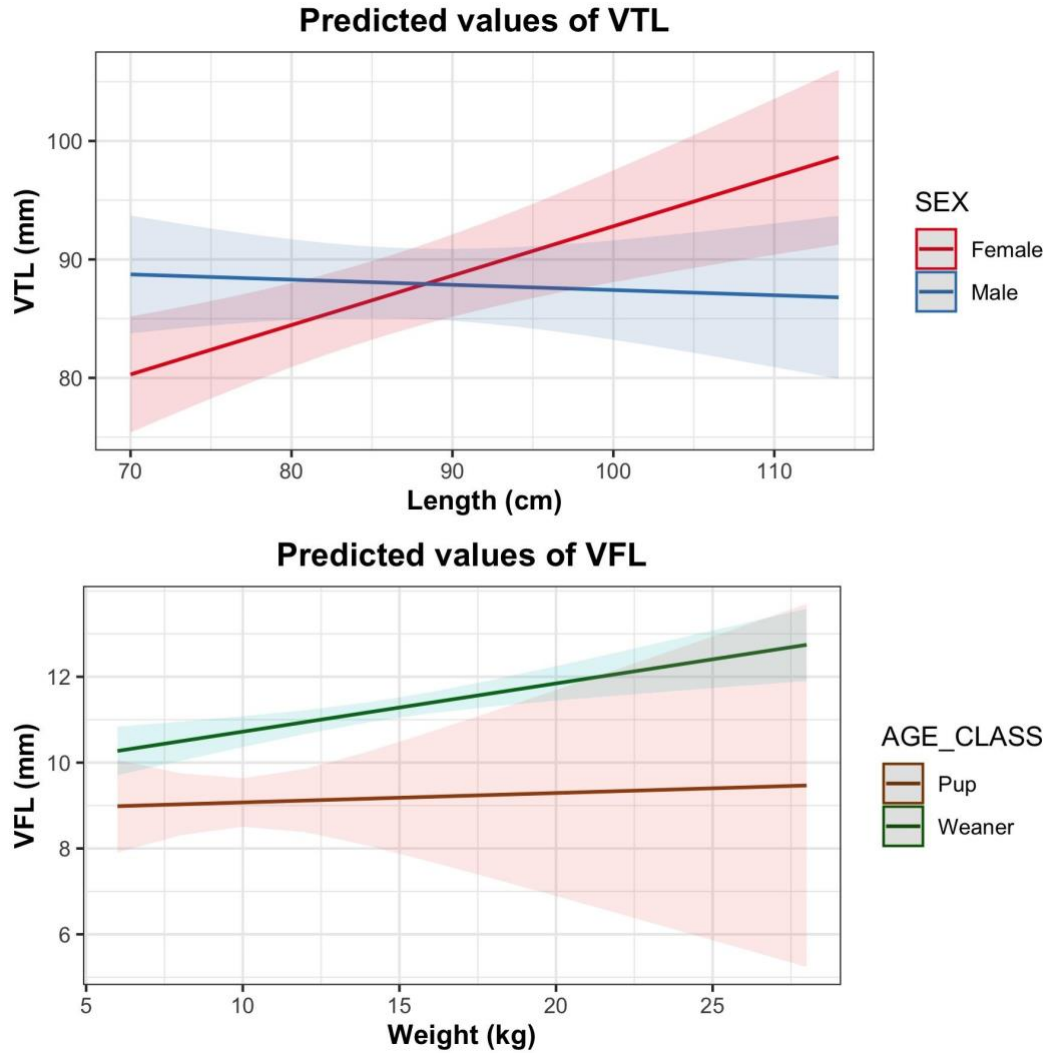

199  
200

201 **Figure 5.** Predicted effects of the body length and sex interaction for VTL including both age classes  
202 (top), and the weight and age interaction for VFL including both sexes (bottom). The shading around each  
203 line of best fit indicates the 95% confidence interval.

204

## 205 **Discussion**

206 This study reports on the allometric relationships between body size and vocal tract dimensions in  
207 harbour seals. It shows that body length accurately predicts VTL, VFL, and STDV1, and body weight  
208 predicts VTL and both tracheal measurements (STDVs). We also find age and sex to be important  
209 predictors for the size of vocal tract structures. This is evidenced by significant differences in  
210 measurements between age classes and significant sexual differences within age classes.

211

212 Previous work showed that upper vocal tract (i.e., filter) dimensions in mammals are predicted by body  
213 size measurements (Fitch, 1997; Fitch & Giedd, 1999; Fitch, 2000; Plotsky, Rendall, Riede, & Chase,  
214 2013; Garcia et al., 2016, Ravignani et al., 2017) and our results provide additional evidence to support  
215 such allometry. Although most studies have used body length as a proxy for body size, we find that body  
216 weight can also be used to predict VTL in harbour seals. In the first years of life, harbour seals show a  
217 linear growth rate for both length (Haukkson, 2006) and weight (Markussen, Bjørge, & Øritsland, 1989),  
218 suggesting that VTL may develop in a similar fashion during this period. Acoustic proxies for the filter  
219 could thus provide a good estimation of a harbour seal's size. In mammals, formant frequencies and  
220 formant spacing can be predicted from VTL and vice versa (see Reby & McComb, 2003). Other acoustic  
221 proxies include energy quartiles, the frequency of amplitude peaks, and the ratios between these  
222 amplitudes (Sauvé et al., 2015). These parameters also encode individual signatures, suggesting that  
223 acoustic individuality may partially be an allometric by-product (Ravignani et al., 2017). Harbour seals  
224 have the vocal tract predispositions to produce vocalisations that accurately reflect body size whilst also  
225 sharing individual-specific information, suggesting that learning does not need to be invoked to explain  
226 individuality.

227

228 Across mammals, source-related features such as F0 can sometimes predict body size despite showing  
229 weaker allometric scaling than filter-related features (Reby & McComb, 2003; Charlton et al., 2011;  
230 Pfefferle et al., 2007; Charlton & Reby, 2016); it was unclear whether this holds for harbour seals  
231 (Ravignani et al., 2017; Bowling et al., 2017). Our findings indicate that vocal fold length, which may be  
232 used to approximate F0, can be predicted by body size in harbour seals. Moreover, Sauvé and colleagues  
233 (2015) reported a decrease in F0 with an increase in body length of harbour seal pups. Taken together,  
234 this suggests that a harbour seal's F0 can be predicted from vocal anatomy. Previous evidence against  
235 allometric scaling for VFL could be explained by low statistical power or lack of testing for age effects on  
236 vocal tract measurements (Ravignani et al., 2017). It is indeed notable that age is included in both  
237 interactions which were retained in the selected VFL model. Our results, including both pups and  
238 weaners, show that allometric scaling between body size and VFL only emerges after weaning,  
239 suggesting that VFL may not be constrained in harbour seal pups (see bottom panel of Figure 5). This  
240 begs the following question: how would escaping acoustic allometry for source-related features be  
241 beneficial for pups? Broadcasting honest body size information may be detrimental for harbour seal pups  
242 as they are significantly more likely to be displaced by larger conspecifics during agonistic interactions  
243 (Neumann, 1999). However, pups may be able to benefit from lowering the F0 (Borda et al., in press) of  
244 their calls to create an impression of size exaggeration. On the other hand, pups may also benefit from

245 increasing the F0 of their calls to create an impression of distress to the mother (Briefer, 2012). Future  
246 playback studies could contrast these hypotheses.

247

248 Several phocid species use the trachea for sound production (Bryden & Felts, 1974), but this could be a  
249 by-product of adaptive modifications to the respiratory tract required for diving (Kooyman & Andersen,  
250 1969; Tyack & Miller, 2002). Our results support the correlation between tracheal diameter and body  
251 length found by Ravnani and colleagues (2017), but also provide evidence that tracheal dimensions can  
252 be predicted by body weight. Previous literature found that the trachea may potentially convey body size  
253 information if its size influences acoustic call features (Ravnani et al., 2017). In humans, a wider  
254 tracheal diameter partially predicts turbulence (i.e., unsteady air movements) for large airflows (Van den  
255 Berg, Zantema, & Doornenbal, 1957). Applying the same logic to other mammals, larger seals would  
256 have wider tracheal dimensions which, in turn, would make vocalisations noisier. This could explain, for  
257 instance, why the signal-to-noise ratio decreases as harbour seals get older (de Reus, 2017; de Reus,  
258 Jadoul, & Ravnani, in prep.). Future work on sound production in this species could test this prediction  
259 using sound-anatomy correlations and excised larynx set-ups. Moreover, playback experiments could test  
260 whether adding noise to vocalisations alters interactive behaviour to determine if signal-to-noise ratio  
261 may encode body size information. Understanding whether the trachea is actively involved in sound  
262 production will thus require further research.

263

264 As expected, all anatomical measurements are larger for weaners than they are for pups. In Ravnani and  
265 colleagues (2017), animals up to 108 days old were classified as pups. However, in the wild, the lactation  
266 period for harbour seals ranges from 23 to 42 days, after which the pups are weaned (Renouf, 2012).  
267 Hence, for the sake of simplicity, we consider animals up to one month old as pups and animals older  
268 than one month as weaners. Thanks to this categorical classification, we were able to identify how  
269 allometric trends develop over the harbour seal's early life. Future research including larynges from  
270 subadults and adults will further extend our knowledge of how vocal allometry develops in harbour seals.

271

272 There were no sexual differences when considering the sample size as a whole, but significant sexual  
273 differences existed within age classes. These differences could be attributed to differing levels of steroid  
274 hormones acting on the laryngeal structures in males and females (Aufdemorte, Sheridan, & Holt, 1983;  
275 Sauvé et al., 2015). In some mammals, sex hormones affect the structural development of the larynx and  
276 the viscoelastic properties of the vocal fold tissue (Fitch & Giedd, 1999; Beckford, Schaid, Rood, &  
277 Schanbacher, 1985). At puberty, the male larynx descends in the vocal tract causing an elongation of the  
278 length of the upper vocal tract, allowing males to convey an exaggerated impression of size (Fitch &

279 Giedd, 1999; Fitch & Reby, 2001). In harbour seal pups, males have larger VTLs than females,  
280 suggesting that laryngeal descent in males possibly occurs early in life. Once weaned, however, females  
281 show a clear increase in VTL whereas it remains relatively constant in males (see top panel of Figure 5),  
282 suggesting that VTL differences across sexes may become less pronounced over time. In mammalian  
283 males, sex hormone action also causes a rapid increase in cartilage size leading to an enlarged larynx and  
284 an increase in the vibrating portion of the vocal folds (Fitch & Hauser, 2003). This could explain why, in  
285 weaners, STDV1 is larger in males than in females. Nevertheless, these findings are somewhat surprising  
286 as young harbour seals normally show little sexual dimorphism (Le Boeuf, 1991). In particular, there is a  
287 lack of evidence for sexual differences regarding birth mass and growth rates among harbour seal pups  
288 (Bowen, Oftedal, Boness, & Iverson, 1994). In our sample, there are no significant body size differences  
289 between sexes ( $p > 0.05$ ), but male pups are slightly larger than female pups in both body length ( $M =$   
290  $81.63 \text{ cm} \pm 4.44$ ,  $F = 77.50 \text{ cm} \pm 4.51$ ) and weight ( $M = 9.82 \text{ kg} \pm 1.49$ ,  $F = 9.78 \text{ kg} \pm 1.55$ ). It is  
291 important to note that the sampled animals were sick and/or in poor condition; hence weight values are  
292 not representative of healthy individuals and should be interpreted with caution. In short, based on these  
293 observed differences in vocal anatomy across sexes, formants are expected to differ in pups and signal-to-  
294 noise ratio is expected to differ in weaners. The anatomical structures that determine these acoustic  
295 features both show strong allometric scaling, hence these parameters may provide distinct body size cues  
296 across age classes, potentially facilitating the discrimination of male and female conspecific calls. Sexual  
297 selection could thus play a role in driving size differences in VTL and STDV1, but it is yet unknown if  
298 these differences are maintained throughout developmental life stages. Future research should aim to  
299 investigate the elastic properties of harbour seal laryngeal tissues and to understand how sex hormones  
300 affect these properties. Hormone levels can be measured by taking blood samples from healthy male and  
301 female seals at different developmental stages, and results can be combined with magnetic resonance  
302 imaging (MRI) mapping of laryngeal tissue elasticity.

303  
304 The high inter-rater reliability observed for VTL, VFL and both STDVs demonstrates that these quantities  
305 can be measured and replicated easily, making them reliable landmarks for vocal tract measurements.  
306 However, tissue properties such as the viscoelasticity of certain vocal tract structures, like the vocal folds,  
307 are significant obstacles to getting accurate measurements. Indeed, raters struggled to produce precise  
308 data for VFT. Future research in the field of pinniped vocal anatomy would benefit from improved  
309 measuring techniques using 2D pictures, radiography, MRI and computed tomography (CT) scans as this  
310 would enable more accurate measurements for structures that are difficult to handle. Finally, future  
311 similar studies should include measurements of another vocal tract structure: the corniculate cartilage.  
312 Although widely absent in terrestrial carnivores, harbour seals have rather large corniculate cartilage that

313 help close the trachea together with the epiglottis (Adams et al., 2020). These cartilages are located close  
314 to the vocal folds and are possibly innervated by the same nerves and controlled by the same muscles. It  
315 may be possible that these cartilages play a role in sound production by, for example, lowering the F0 by  
316 adding weight to the vocal folds. Taken together, these suggestions will provide a more precise and  
317 detailed picture of the harbour seal's vocal anatomy.

318  
319 Observed species-specific vocalisations are determined by both the species' vocal anatomy and their  
320 capacity for vocal learning (Garcia & Ravignani 2020; Ravignani & Garcia 2021). The vocal anatomy  
321 generates vocal predispositions by imposing biomechanical constraints, whereas neural processes  
322 determine the degree of control species have over their vocal organs (Garcia & Manser, 2020).  
323 Particularly, vocal learners, like the harbour seal, are capable of actively modulating sounds, suggesting  
324 that they are less constrained by anatomy and have a refined capacity for vocal motor control.  
325 Unfortunately, the relative contribution of both sound production mechanisms is unclear. Here, we  
326 provide support for a hypothesis trying to segregate anatomical vs. learning mechanisms (Garcia &  
327 Ravignani, 2020; Ravignani & Garcia 2021). We find that harbour seals are mechanically constrained  
328 by their vocal anatomy, and their large vocal flexibility (Ralls et al., 1985; Borda et al., in press) thus  
329 points towards extensive volitional control over their vocalisations. As shown here, by testing for  
330 allometric relationships between body size and vocal tract structures, one can start to disentangle the  
331 respective contributions of vocal anatomy and vocal motor control in shaping acoustic signals.

332

### 333 **Conclusion**

334 In sum, we provide evidence of allometry between body size and vocal tract measurements in harbour  
335 seals. Body length is a strong predictor for VTL, VFL, and STDV1, and body weight is a strong predictor  
336 for VTL and both tracheal measurements (STDVs). Age and sex are also important in predicting the  
337 dimensions of these anatomical structures. Taken together, the combined findings demonstrate that  
338 harbour seal vocal tracts do indeed scale with body size, although allometry between VTL and body size  
339 may only emerge after weaning. Inferences, based on their vocal tract or body size, can now be made  
340 about the vocal predispositions of harbour seals (e.g., F0, formants, signal-to-noise ratio). Comparing  
341 these predictions to data obtained from observed natural vocalisations will shed light on the range of  
342 vocal flexibility resulting from their extensive vocal motor control. Moreover, connecting harbour seals'  
343 vocal anatomy measurements to the vocalisations they produce while alive is a critical next step to  
344 directly relate acoustic features to sound production structures. Integrating such results with investigations  
345 of call function will eventually inform on which vocal structures are responsible for generating the  
346 individual- and species-specific information encoded in harbour seals' vocalisations.

347

348 **Methods**

349 *Sample collection*

350 Larynges were collected during necropsies on 68 harbour seals (35 males). 52 samples came from seals  
351 that stranded on the Dutch coastline, the rest from animals found on the German coastline (Schleswig-  
352 Holstein). Forty-two animals died in captivity at Sealcentre Pieterburen, Pieterburen, the Netherlands,  
353 either naturally during rehabilitation or by means of euthanasia, and 26 animals died in the wild, either  
354 naturally or by means of mercy killing (see Table 1 of the Supplement). No animals were harmed for the  
355 purpose of this study.

356

357 At the time of death, the seals studied were aged between 9 days and 12 months (median 6 months). The  
358 age of new-born individuals was estimated in number of days by expert seal veterinarians based on the  
359 condition of the umbilical cord or the umbilicus. Older individuals with a closed umbilicus were assigned  
360 June as their birth month, which is consistent with the majority of harbour seal births in the Wadden Sea  
361 (Osinga, Nussbaum, Brakefield, & de Haes, 2012; Reijnders, Brasseur, & Meesters, 2010). Animals aged  
362 1 month or younger were classified as pups, while those between 1 and 12 months in age were classified  
363 as weaners, making age a binary variable. Of the 68 individuals included in this study, 14 (8 males) were  
364 classified as pups and 54 (26 males) were classified as weaners. A Fisher's exact test showed no  
365 significant associations between age and sex ( $\chi^2 = 0.7652, p > .05$ ), suggesting our sample is balanced  
366 between sexes and ages.

367

368 *Sample treatment and measurements*

369 Post-mortem examinations were performed by trained veterinarians. Dutch seals were examined at  
370 Sealcentre Pieterburen and German seals were necropsied at the Institute for Terrestrial and Aquatic  
371 Wildlife Research (ITAW), Büsum, Germany. Necropsies were performed on either cooled or defrosted  
372 carcasses. Body weight, body length and axillary girth were all measured prior to the start of the  
373 necropsy. Body length was measured from the tip of the nose to the end of the tail in a non-curved  
374 fashion, while the animal was in supine position, and axillary girth was measured as the body  
375 circumference directly caudal to the front flippers. The vocal apparatus including the upper vocal tract,  
376 the larynx, and part of the trachea was then removed and immediately frozen at -20°C. All samples were  
377 in a similar condition (i.e., none presented signs of decomposition), comparable to pinniped vocal tracts in  
378 Schneider (1962) and Ravignani and colleagues (2017).

379

380 Prior to measurement, samples were thawed in a refrigerator at 8°C and each larynx was cut medially to  
381 produce two hemi-vocal tracts. The measurements taken on these hemi-vocal tracts include vocal tract  
382 length (VTL), vocal fold length (VFL), vocal fold thickness (VFT), and tracheal measurements in the  
383 form of subglottic-tracheal dorsoventral distances (STDVs) (called subglottic-tracheal anterior-posterior  
384 distance, STAP, in Roers, Mürbe, & Sundberg, 2009) using a calliper to an accuracy of  $\pm 0.01$  mm (see  
385 Figure 2). Although the vocal tract can be divided into lower (below larynx) and upper (above larynx)  
386 sections, formants (the resonant frequencies which often encode information about body size) are only  
387 determined by the upper vocal tract (Lester & LaGasse, 2008). VTL will henceforth refer to the length of  
388 the upper vocal tract. VTL was measured as the linear distance from the caudal end of the epiglottis to the  
389 rostral end of the tongue muscle while the tongue was kept straight. VFL was measured as the distance  
390 from the ventral attachment of the vocal fold on the thyroid cartilage to the dorsal attachment of the vocal  
391 fold on the arytenoid cartilage. VFT was measured as the distance between the anterior and posterior  
392 sides of the vocal folds. The first STDV was measured as the distance between the cricothyroid ligament  
393 and the caudal end of the arytenoid. The second STDV was measured as the diameter of the first tracheal  
394 ring. All measurements were performed independently by two researchers. For both researchers, VTL,  
395 VFL, and VFT were measured twice for each hemi-vocal tract, and STDVs were taken once for each  
396 hemi-larynx because the start and end measuring points were composed of cartilage (as opposed to soft  
397 tissue) and hence, we assumed that the inter-rater reliability for STDVs would be higher than for other  
398 measurements.  
399



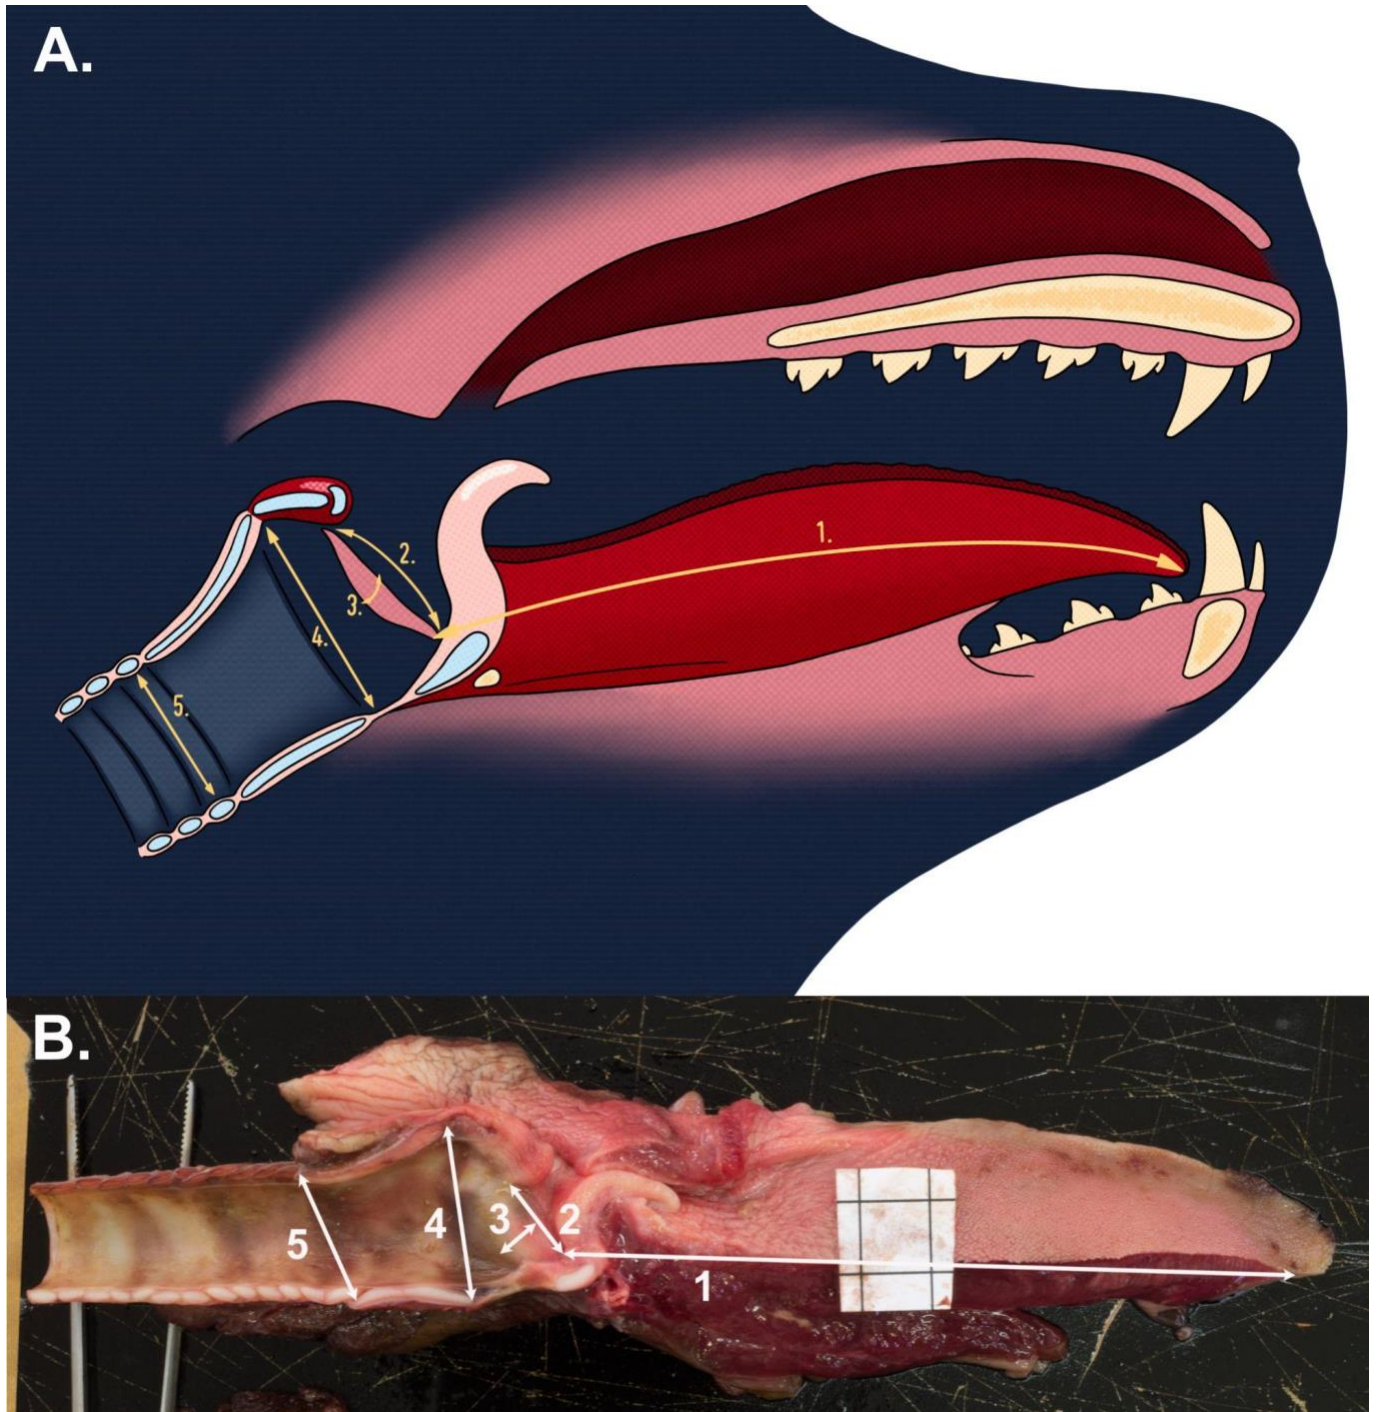

400

401 **Figure 2.** Images depicting the measurements taken using (A) a digital rendering of the vocal tract and

402 (B) one hemi-larynx of a harbour seal pup. The vocal tract measurements taken include (1) vocal tract

403 length (VTL), (2) vocal fold length (VFL), (3) vocal fold thickness (VFT), (4) subglottic-tracheal

404 dorsoventral distance 1 (STDV1), and (5) subglottic-tracheal dorsoventral distance 2 (STDV2). In panel

405 B, the black square outlined on the white paper serves as reference and is exactly 1 cm<sup>2</sup>.

406

407 *Statistical analysis*

408 Statistical analyses were performed in RStudio version 1.1.463 (R version 4.0.4). First, for both raters, the  
409 medians for VTL, VFL and VFT were computed from all values reported for every right and left hemi-  
410 larynx. Second, using the medians from the first step, the median values for all measurements including  
411 STDV1 and STDV2 were computed for each larynx. This provided, for each larynx and rater, five  
412 measurements: VTL, VFL, VFT, STDV1 and STDV2. The inter-rater reliability for VTL, VFL, VFT,  
413 STDV1 and STDV2 was evaluated using Pearson's correlations. Finally, the overall median values  
414 between raters were computed for all measurements. Using these new values, Spearman's correlations  
415 between body size and vocal anatomy measurements were then calculated (see Table 1). For each  
416 measurement, normality was assessed using the Shapiro-Wilk test and homogeneity of variance was  
417 assessed using an F-test. If both assumptions were met, a two-tailed independent samples t-test was  
418 computed to check for age and sex differences. When variables were not normally distributed, but  
419 samples had equal variance, a Mann Whitney U-test was performed to assess group differences instead.

420  
421 Predictive modelling was done using generalised linear models (GLMs) with the *stats* package (R Core  
422 Team, 2013). A series of models were produced for all anatomical measurements with high inter-rater  
423 reliability ( $r > 0.70$ ). For every response variable, the full model included the fixed effects length, weight,  
424 girth, sex, age and the interaction effects of sex with all body size predictors, age with all body size  
425 predictors and the interaction of age and sex. The reduced model was then obtained through stepwise  
426 regression based on Akaike Information Criterion (AIC) values. An analysis of variance (ANOVA) test  
427 was performed to ensure that the reduced model was not performing significantly worse than the full one.  
428 Variance inflation factors (VIF) scores were calculated for all predictors included in the reduced models  
429 using the *car* package (Fox & Weisberg, 2019). Multicollinearity was considered problematic for  
430 subsequent model selection if VIF scores were greater than 5 (Akinwande, Dikko, & Samson, 2015). For  
431 all selected models, deviance explained was calculated from the model output ( $1 - \text{residual deviance} / \text{null}$   
432  $\text{deviance}$ ) and expressed as a percentage. Plots displaying the predicted effects of every predictor retained  
433 in the final models were produced to assess their relationship with the response variable. Diagnostic  
434 residual plots were used to verify the model assumptions. Independence of residuals was tested using a  
435 Durbin Watson test (Fox & Weisberg, 2019). Normality of residuals was assessed visually by plotting  
436 model fit against the observed data. Homoscedasticity (i.e., constant variance) of residuals was also  
437 assessed visually using quantile-quantile plots. Finally, influential data points were assessed by  
438 calculating Cook's distance.

439

440

441 **Acknowledgments**

442 We are grateful to Letty Stupers, Rebecca Andreini, Maria Jose Robles for helping in gathering and  
443 preparing samples for data collection. We thank Aline Joustra for her illustrations of seal vocal tracts. We  
444 also greatly appreciate the extensive comments provided by Taylor Hersh and Laura Verga. We would  
445 also like to thank all members and volunteers of Sealcentre Pieterburen for their continued support in this  
446 research.

447

448 **Competing interests**

449 The authors declare no competing interests.

450

451 **Funding**

452 This work was supported by a Max Planck Research Group (MPRG) and a FWO Pegasus Marie Curie  
453 fellowship 12N5517N awarded to AR. KdR was supported by the FWO project ‘Interactive vocal  
454 rhythms’ G034720N awarded to Bart de Boer. The German Ministry of Energy, Agriculture, the  
455 Environment, Nature and Digitalization (MELUND) funded the marine mammal stranding scheme and  
456 the necropsies in Schleswig-Holstein. The Sealcentre Pieterburen funded the seal stranding scheme and  
457 the necropsies at the Sealcentre Pieterburen. MG was supported by a research grant from the Ethologische  
458 Gesellschaft e.V.

459

460

461 **Reference list**

462 Adams, A., Vogl, W., Dawson, C., Raverty, S., Haulena, M., & Skoretz, S. A. (2020). Laryngeal and soft palate  
463 valving in the harbour seal (*Phoca vitulina*). *Journal of Experimental Biology*, 223(20).

464 Akinwande, M. O., Dikko, H. G., & Samson, A. (2015). Variance inflation factor: as a condition for the inclusion of  
465 suppressor variable (s) in regression analysis. *Open Journal of Statistics*, 5(07), 754.

466 Aufdemorte, T. B., Sheridan, P. J., & Holt, G. R. (1983). Autoradiographic evidence of sex steroid receptors in  
467 laryngeal tissues of the baboon (*Papio cynocephalus*). *The Laryngoscope*, 93(12), 1607–1611.  
468 <https://doi.org/10.1288/00005537-198312000-00013>

469 Beckford, N. S., Schaid, D., Rood, S. R., & Schanbacher, B. (1985). Androgen stimulation and laryngeal  
470 development. *Annals of Otolaryngology, Rhinology and Laryngology*, 94(6 I), 634–640.  
471 <https://doi.org/10.1177/000348948509400622>

472 Bjørge, A., Desportes, G., Waring, G. T., & Rosing-Asvid, A. (2010). Introduction: the harbour seal (*Phoca*  
473 *vitulina*)-a global perspective. *NAMMCO Scientific Publications*, 8, 7-11.

474

475 Borda, L. T., Jadoul, Y., Rasilo, H., Casals, A. S., & Ravnani, A. (2021). Vocal plasticity in harbour seal pups.  
476 *Philosophical Transactions of the Royal Society B: Biological Sciences*. 376, 20200456.  
477 <https://doi.org/10.1098/rstb.2020.0456>

478

- 479 Bowen, W. D. (1991). Behavioural ecology of pinniped neonates. In *The Behaviour of Pinnipeds* (pp. 66–127).  
480 Springer Netherlands. [https://doi.org/10.1007/978-94-011-3100-1\\_3](https://doi.org/10.1007/978-94-011-3100-1_3)
- 481 Bowen, W., Oftedal, O., Boness, D., & Iverson, S. (1994). The effect of maternal age and other factors on birth mass  
482 in the harbour seal. *Canadian Journal of Zoology*, 72, 8–14.
- 483 Bowling, D. L., Garcia, M., Dunn, J. C., Ruprecht, R., Stewart, A., Frommolt, K. H., & Fitch, W. T. (2017). Body  
484 size and vocalization in primates and carnivores. *Scientific reports*, 7(1), 1–11.
- 485 Briefer, E. F. (2012). Vocal expression of emotions in mammals: mechanisms of production and evidence. *Journal*  
486 *of Zoology*, 288(1), 1–20.
- 487 Bryden, M. M., & Felts, W. J. (1974). Quantitative anatomical observations on the skeletal and muscular systems of  
488 four species of Antarctic seals. *Journal of Anatomy*, 118(Pt 3), 589–600.
- 489  
490 Charlton, B., Ellis, W., McKinnon, A., Cowin, G., Brumm, J., Nilsson, K., & Fitch, W. (2011). Cues to body size in  
491 the formant spacing of male koala (*Phascolarctos cinereus*) bellows: honesty in an exaggerated trait.  
492 *Journal of Experimental Biology*, 214(20), 3414–3422. <https://doi.org/10.1242/jeb.061358>
- 493  
494 Charlton, B. D., & Reby, D. (2016). The evolution of acoustic size exaggeration in terrestrial mammals. *Nature*  
495 *Communications*, 7(1), 1–8. <https://doi.org/10.1038/ncomms12739>
- 496  
497 Charlton, B., Zhihe, Z., & Snyder, R. (2009). The information content of giant panda, *Ailuropoda melanoleuca*,  
498 bleats: acoustic cues to sex, age and size. *Animal Behaviour*, 78(4), 893–898.
- 499  
500 Fant, G. (1970). *Acoustic theory of speech production* (2nd ed.). The Hague: Mouton.
- 501  
502 Fitch, W. T. (1997). Vocal tract length and formant frequency dispersion correlate with body size in rhesus  
503 macaques. *The Journal of the Acoustical Society of America*, 102(2), 1213–1222.  
504 <https://doi.org/10.1121/1.421048>
- 505  
506 Fitch, W.T. (2000). The evolution of speech: a comparative review. *Trends in Cognitive Sciences*, 4(7), 258–267.
- 507  
508 Fitch, W. T., & Giedd, J. (1999). Morphology and development of the human vocal tract: A study using magnetic  
509 resonance imaging. *The Journal of the Acoustical Society of America*, 106(3), 1511–1522.  
510 <https://doi.org/10.1121/1.427148>
- 511  
512 Fitch, W. T., & Hauser, M. D. (1995). Vocal production in nonhuman primates: Acoustics, physiology, and  
513 functional constraints on “honest” advertisement. *American Journal of Primatology*, 37(3), 191–219.  
514 <https://doi.org/10.1002/ajp.1350370303>
- 515  
516 Fitch, W. T., & Hauser, M. D. (2003). Unpacking “Honesty”: Vertebrate Vocal Production and the Evolution of  
517 Acoustic Signals. In *Acoustic Communication* (pp. 65–137). Springer-Verlag. [https://doi.org/10.1007/0-](https://doi.org/10.1007/0-387-22762-8_3)  
518 [387-22762-8\\_3](https://doi.org/10.1007/0-387-22762-8_3)
- 519  
520 Fitch, W.T., & Reby, D. (2001). The descended larynx is not uniquely human. *Proceedings of the Royal Society of*  
521 *London. Series B: Biological Sciences*, 268(1477), 1669–1675. <https://doi.org/10.1098/rspb.2001.1704>
- 522  
523 Fox, J., & Weisberg, S. (2019). *An R Companion to Applied Regression*, Third edition. Sage, Thousand Oaks CA.  
524 <https://socialsciences.mcmaster.ca/jfox/Books/Companion/>.
- 525  
526 Garcia, M., Herbst, C. T., Bowling, D. L., Dunn, J. C., & Fitch, W. T. (2017). Acoustic allometry revisited:  
527 morphological determinants of fundamental frequency in primate vocal production. *Scientific reports*, 7(1),  
528 1–11.

- 525  
526 Garcia, M., & Manser, M. (2020). Bound for Specific Sounds: Vocal Predisposition in Animal Communication.  
527 *Trends in Cognitive Sciences*, 24(9), 690-693.  
528
- 529 Garcia, M., & Ravignani, A. (2020). Acoustic allometry and vocal learning in mammals. *Biology Letters*, 16(7),  
530 20200081.  
531
- 532 Garcia, M., Wondrak, M., Huber, L., & Fitch, W. T. (2016). Honest signaling in domestic piglets (*Sus scrofa*  
533 *domesticus*): vocal allometry and the information content of grunt calls. *The Journal of Experimental*  
534 *Biology*, 219, 1913–1921. <https://doi.org/10.1242/jeb.138255>  
535
- 536 Hanggi, E. B., & Schusterman, R. J. (1994). Underwater acoustic displays and individual variation in male harbour  
537 seals, *Phoca vitulina*. *Animal Behaviour*, 48(6), 1275–1283. <https://doi.org/10.1006/anbe.1994.1363>  
538
- 539 Hauksson, E. (2006). Growth and reproduction in the Icelandic common seal (*Phoca vitulina* L., 1758). *Marine*  
540 *Biology Research*, 2(01), 59-73.  
541
- 542 Khan, C. B., Markowitz, H., & McCowan, B. (2006). Vocal development in captive harbor seal pups, *Phoca vitulina*  
543 *richardii*: Age, sex, and individual differences. *The Journal of the Acoustical Society of America*, 120(3),  
544 1684–1694. <https://doi.org/10.1121/1.2226530>  
545
- 546 Kooyman, G., & Andersen, H. (1969). Deep diving. *The Biology of Marine Mammals*, 65–94.  
547
- 548 Koren, L., & Geffen, E. (2009). Androgens and social status in female rock hyraxes. *Animal Behaviour*, 77(1), 233–  
549 238.  
550
- 551 Kuester, J., Paul, A., & Arnemann, J. (1995). Age-related and individual differences of reproductive success in male  
552 and female barbary macaques (*Macaca sylvanus*). *Primates*, 36(4), 461–476.
- 553 Le Boeuf, B. J. (1991). Pinniped mating systems on land, ice and in the water: Emphasis on the Phocidae. In *The*  
554 *Behaviour of Pinnipeds* (pp. 45–65). Springer Netherlands. [https://doi.org/10.1007/978-94-011-3100-1\\_2](https://doi.org/10.1007/978-94-011-3100-1_2)
- 555 Lester, B. M., & LaGasse, L. L. (2008). Crying. In *Encyclopedia of Infant and Early Childhood Development* (Vol.  
556 1–3, pp. 332–343). Elsevier Inc. <https://doi.org/10.1016/B978-012370877-9.00045-1>
- 557 Markussen, N. H., Bjørge, A., & Øritsland, N. A. (1989). Growth in harbour seals (*Phoca vitulina*) on the  
558 Norwegian coast. *Journal of Zoology*, 219(3), 433-440.  
559
- 560 Martin, K., Tucker, M. A., & Rogers, T. L. (2017). Does size matter? Examining the drivers of mammalian  
561 vocalizations. *Evolution*, 71(2), 249–260. <https://doi.org/10.1111/evo.13128>  
562
- 563 Neumann, D. R. (1999). Agonistic behavior in harbor seals (*Phoca vitulina*) in relation to the availability of haul-out  
564 space. *Marine Mammal Science*, 15(2), 507-525.  
565
- 566 Osinga, N., Nussbaum, S. B., Brakefield, P. M., & de Haes, H. A. U. (2012). Response of common seals (*Phoca*  
567 *vitulina*) to human disturbances in the Dollard estuary of the Wadden Sea. *Mammalian Biology*, 77(4),  
568 281–287. <https://doi.org/10.1016/j.mambio.2012.02.005>  
569
- 570 Perry, E. A., & Renouf, D. (1988). Further studies of the role of harbour seal (*Phoca vitulina*) pup vocalizations in  
571 preventing separation of mother–pup pairs. *Canadian Journal of Zoology*, 66(4), 934–938.  
572 <https://doi.org/10.1139/z88-138>  
573
- 574 Pfefferle, D., & Fischer, J. (2006). Sounds and size: identification of acoustic variables that reflect body size in  
575 hamadryas baboons, *Papio hamadryas*. *Animal Behaviour*, 72(1), 43–51.  
576

- 577 Pfefferle, D., West, P. M., Grinnell, J., Packer, C., & Fischer, J. (2007). Do acoustic features of lion, *Panthera leo*,  
578 roars reflect sex and male condition? *The Journal of the Acoustical Society of America*, 121(6), 3947.  
579 <https://doi.org/10.1121/1.2722507>  
580
- 581 Plotsky, K., Rendall, D., Riede, T., & Chase, K. (2013). Radiographic analysis of vocal tract length and its relation  
582 to overall body size in two canid species. *Journal of Zoology*, 291(1), 76–86.  
583 <https://doi.org/10.1111/jzo.12048>  
584
- 585 Poole, J. H. (1999). Signals and assessment in African elephants: Evidence from playback experiments. *Animal*  
586 *Behaviour*, 58(1), 185–193. <https://doi.org/10.1006/anbe.1999.1117>  
587
- 588 R Core Team (2013). R: A language and environment for statistical computing. R Foundation for Statistical  
589 Computing, Vienna, Austria. ISBN 3-900051-07-0, URL <http://www.R-project.org/>.  
590
- 591 Ralls, K., Fiorelli, P., & Gish, S. (1985). Vocalizations and vocal mimicry in captive harbor seals, *Phoca vitulina*.  
592 *Canadian Journal of Zoology*, 63(5), 1050–1056. <https://doi.org/10.1139/z85-157>  
593
- 594 Ravignani, A., Fitch, W. T., Hanke, F. D., Heinrich, T., Hurgitsch, B., Kotz, S. A., ... de Boer, B. (2016). What  
595 pinnipeds have to say about human speech, music, and the evolution of rhythm. *Frontiers in Neuroscience*,  
596 10, 274. <https://doi.org/10.3389/fnins.2016.00274>  
597
- 598 Ravignani, A., & Garcia, M. (2021). A cross-species framework to identify vocal learning abilities in mammals.  
599 *Philosophical Transactions of the Royal Society B: Biological Sciences*. 376, 20200394.  
600 <https://doi.org/10.1098/rstb.2020.0394>  
601
- 602 Ravignani, A., Gross, S., Garcia, M., Rubio-Garcia, A., & De Boer, B. (2017). How small could a pup sound? The  
603 physical bases of signaling body size in harbor seals. *Current Zoology*, 63(4), 457–465.  
604
- 605 Reby, D., & McComb, K. (2003). Anatomical constraints generate honesty: Acoustic cues to age and weight in the  
606 roars of red deer stags. *Animal Behaviour*, 65(3), 519–530. <https://doi.org/10.1006/anbe.2003.2078>  
607
- 608 Reidenberg, J. S., & Laitman, J. T. (2010). Generation of sound in marine mammals. In *Handbook of Behavioral*  
609 *Neuroscience* (Vol. 19, pp. 451–465). Elsevier. <https://doi.org/10.1016/B978-0-12-374593-4.00041-3>  
610
- 611 Reijnders, P. J. H., Brasseur, S. M. J. M., & Meesters, E. H. W. G. (2010). Earlier pupping in harbour seals, *Phoca*  
612 *vitulina*. *Biology Letters*, 6(6), 854–857. <https://doi.org/10.1098/rsbl.2010.0468>  
613
- 614 Renouf, D. (1984). The vocalization of the Harbour seal pup (*Phoca vitulina*) and its role in the maintenance of  
615 contact with the mother. *Journal of Zoology*, 202(4), 583–590. <https://doi.org/10.1111/j.1469-7998.1984.tb05055.x>  
616
- 617 Renouf, D. (2012). *The behaviour of pinnipeds*. Springer Science & Business Media.  
618
- 619 de Reus, K. (2017). Talking seals: vocal development in Eastern Atlantic harbour seal pups (*Phoca vitulina*  
620 *vitulina*). MSc Thesis, Royal Veterinary College, University of London.  
621
- 622 de Reus, K., Jadoul, Y., & Ravignani, A. (in prep.). Vocal development in Eastern Atlantic harbour seal pups  
623 (*Phoca vitulina vitulina*).  
624
- 625 Roers, F., Mürbe, D., & Sundberg, J. (2009). Predicted singers' vocal fold lengths and voice classification—a study  
626 of x-ray morphological measures. *Journal of Voice*, 23(4), 408–413.  
627
- 628 Sauv e, C., Beauplet, G., Hammill, M., & Charrier, I. (2015). Acoustic analysis of airborne, underwater, and  
629 amphibious mother attraction calls by wild harbor seal pups (*Phoca vitulina*). *Journal of Mammalogy*,  
630 96(3), 591–602.  
631

- 632  
633 Schneider, R. (1962). Vergleichende untersuchungen am kehlkopf der robben (mammalia, carnivora, pinnipedia).  
634 *Gegenbaurs Morph Jb*, 103, 177–262.  
635  
636 Taylor, A. M., & Reby, D. (2010). The contribution of source-filter theory to mammal vocal communication  
637 research. *Journal of Zoology*, 280(3), 221–236.  
638  
639 Tyack, P., & Miller, E. (2002). Vocal anatomy, acoustic communication and echolocation. In *Marine mammal*  
640 *biology: An evolutionary approach* (pp. 142–184). Oxford: Wiley-Blackwell.  
641  
642 Van den Berg, J., Zantema, J. T., & Doornenbal, P. (1957). On the Air Resistance and the Bernoulli Effect of the  
643 Human Larynx. *The Journal of the Acoustical Society of America*, 29(5), 626–631.  
644 <https://doi.org/10.1121/1.1908987>  
645  
646 Van Parijs, S. M., & Kovacs, K. M. (2002). In-air and underwater vocalizations of eastern Canadian harbour seals,  
647 *Phoca vitulina*. *Canadian Journal of Zoology*, 80(7), 1173–1179. <https://doi.org/10.1139/z02-088>  
648  
649 Vignal, C., & Kelley, D. (2007). Significance of temporal and spectral acoustic cues for sexual recognition in  
650 *Xenopus laevis*. *Proceedings of the Royal Society B: Biological Sciences*, 274(1609), 479–488.  
651 <https://doi.org/10.1098/rspb.2006.3744>  
652  
653 Wyman, M., Mooring, M., McCowan, B., Penedo, M., & Hart, L. (2008). Amplitude of bison bellows reflects male  
654 quality, physical condition and motivation. *Animal Behaviour*, 76(5), 1625–1639.  
655  
656

657  
658  
659  
660  
661  
662  
663  
664  
665

### Supplementary material

Koen de Reus, Daryll Carlson, Alice Lowry, Stephanie Gross, Maxime Garcia, Ana Rubio-Garcia, Anna Salazar-Casals, Andrea Ravignani

Table 1

*List of sampled animals*

| <b>ID</b> | <b>Age class</b> | <b>Where from</b> | <b>Sex</b> | <b>Length (cm)</b> | <b>Weight (kg)</b> | <b>Girth (cm)</b> | <b>Cause of death</b>  |
|-----------|------------------|-------------------|------------|--------------------|--------------------|-------------------|------------------------|
| 1         | weaner           | NL                | F          | 86                 | 15.6               | 90                | Euthanised             |
| 2         | weaner           | NL                | F          | 99                 | 17.3               | 83                | Died during rehab      |
| 3         | weaner           | NL                | M          | 96                 | 26.8               | 76                | Found dead in the wild |
| 4         | weaner           | NL                | M          | 96                 | 22.9               | 71                | Euthanised             |
| 5         | weaner           | NL                | M          | 86                 | 19.2               | 71                | Died before rehab      |
| 6         | weaner           | NL                | M          | 84                 | 18.2               | 69                | Euthanised             |
| 7         | weaner           | NL                | M          | 89                 | 19.9               | 66                | Euthanised             |
| 8         | weaner           | NL                | F          | 94                 | 14.2               | 66                | Euthanised             |
| 9         | weaner           | NL                | F          | 92                 | 15.8               | 65                | Euthanised             |
| 10        | weaner           | NL                | F          | 94                 | 14.9               | 65                | Died during rehab      |
| 11        | weaner           | NL                | M          | 104                | 20.8               | 64                | Died before rehab      |
| 12        | weaner           | NL                | F          | 86                 | 16.5               | 63                | Died during rehab      |
| 13        | weaner           | NL                | F          | 86                 | 15.7               | 63                | Euthanised             |
| 14        | weaner           | NL                | M          | 100                | 18.37              | 62                | Euthanised             |
| 15        | weaner           | NL                | F          | 93                 | 16.8               | 62                | Euthanised             |
| 16        | weaner           | NL                | M          | 114                | 18.8               | 61                | Died before rehab      |
| 17        | weaner           | NL                | F          | 87                 | 15.8               | 61                | Euthanised             |
| 18        | weaner           | NL                | F          | 93                 | 17.8               | 60.5              | Euthanised             |
| 19        | weaner           | NL                | M          | 96                 | 16.3               | 60                | Died during rehab      |
| 20        | weaner           | NL                | F          | 82                 | 15.3               | 60                | Euthanised             |
| 21        | weaner           | NL                | M          | 80                 | 14.3               | 60                | Died before rehab      |
| 22        | weaner           | NL                | F          | 88                 | 16.1               | 59                | Died during rehab      |
| 23        | weaner           | NL                | F          | 89                 | 16.9               | 58                | Euthanised             |
| 24        | weaner           | NL                | F          | 71                 | 10                 | 58                | Euthanised             |
| 25        | weaner           | NL                | M          | 92                 | 17                 | 57                | Euthanised             |
| 26        | weaner           | NL                | F          | 94                 | 14.5               | 57                | Died during rehab      |
| 27        | weaner           | NL                | M          | 86                 | 13.9               | 57                | Died before rehab      |
| 28        | weaner           | NL                | F          | 79                 | 11.9               | 56.5              | Euthanised             |
| 29        | weaner           | NL                | M          | 85                 | 14.6               | 56                | Died during rehab      |
| 30        | weaner           | NL                | M          | 94                 | 14.6               | 55                | Euthanised             |



|    |        |    |   |      |       |      |                        |
|----|--------|----|---|------|-------|------|------------------------|
| 31 | weaner | NL | F | 92   | 13.7  | 55   | Died during rehab      |
| 32 | weaner | NL | M | 80   | 13.1  | 55   | Died during rehab      |
| 33 | pup    | NL | F | 75   | 11.9  | 55   | Euthanised             |
| 34 | pup    | NL | M | 84   | 11.79 | 54   | Found dead in the wild |
| 35 | weaner | NL | F | 93   | 14    | 53   | Died during rehab      |
| 36 | pup    | NL | M | 83   | 11.47 | 52   | Euthanised             |
| 37 | weaner | NL | F | 93   | 13.9  | 51.5 | Euthanised             |
| 38 | weaner | NL | M | 86   | 13    | 51.5 | Died before rehab      |
| 39 | weaner | NL | F | 87   | 12.4  | 51   | Died before rehab      |
| 40 | pup    | NL | M | 86   | 10.6  | 51   | Euthanised             |
| 41 | pup    | NL | F | 81   | 11.37 | 49.5 | Euthanised             |
| 42 | pup    | NL | F | 82   | 9.3   | 49   | Found dead in the wild |
| 43 | pup    | NL | M | 80   | 9.46  | 47   | Euthanised             |
| 44 | pup    | NL | M | 73   | 8.6   | 46   | Found dead in the wild |
| 45 | pup    | NL | F | 77   | 8.5   | 44.5 | Died before rehab      |
| 46 | pup    | NL | F | 80   | 9.63  | 44   | Found dead in the wild |
| 47 | weaner | NL | M | 87   | 9.3   | 44   | Died during rehab      |
| 48 | pup    | NL | F | 70   | 8     | 44   | Found dead in the wild |
| 49 | pup    | NL | M | 87   | 9.43  | 41   | Found dead in the wild |
| 50 | weaner | NL | F | 77   | 7.47  | 40   | Euthanised             |
| 51 | pup    | NL | M | 80   | 7.28  | 38.5 | Died during rehab      |
| 52 | pup    | NL | M | 80   | 9.95  | 36   | Died before rehab      |
| 53 | weaner | DE | M | 85.5 | 19.2  | 67.5 | Mercy killed           |
| 54 | weaner | DE | F | 98.5 | 17    | 66   | Mercy killed           |
| 55 | weaner | DE | M | 90   | 14.6  | 65   | Mercy killed           |
| 56 | weaner | DE | M | 101  | 20.8  | 64   | Mercy killed           |
| 57 | weaner | DE | M | 90   | 17    | 63   | Found dead in the wild |
| 58 | weaner | DE | F | 92   | 20.4  | 62   | Found dead in the wild |
| 59 | weaner | DE | F | 99   | 17.8  | 60.5 | Mercy killed           |
| 60 | weaner | DE | M | 86   | 16    | 60.5 | Found dead in the wild |
| 61 | weaner | DE | M | 90   | 16.6  | 59   | Found dead in the wild |
| 62 | weaner | DE | F | 94   | 17    | 58   | Found dead in the wild |
| 63 | weaner | DE | M | 90   | 14.6  | 57   | Mercy killed           |
| 64 | weaner | DE | M | 96   | 13.4  | 56   | Found dead in the wild |
| 65 | weaner | DE | F | 82   | 11.6  | 55.5 | Found dead in the wild |
| 66 | weaner | DE | F | 97   | 14.8  | 54   | Mercy killed           |
| 67 | weaner | DE | M | 81   | 10.2  | 51   | Mercy killed           |
| 68 | weaner | DE | F | 88.5 | 12    | 50   | Mercy killed           |

666 *Note.* Seals were from the Netherlands (NL) or Germany (DE). Sex is denoted as F for females and M for  
667 males.

668

669 Table 2

670 *Pairwise Spearman correlations for pups*

671

| Variable    | Length<br>(cm) | Weight<br>(kg) | Girth<br>(cm) | VTL<br>(mm) | VFL<br>(mm) | VFT<br>(mm) | STAP1<br>(mm) |
|-------------|----------------|----------------|---------------|-------------|-------------|-------------|---------------|
| Weight (kg) | 0.40           |                |               |             |             |             |               |
| Girth (cm)  | 0.23           | 0.72           |               |             |             |             |               |
| VTL (mm)    | 0.23           | -0.03          | -0.04         |             |             |             |               |
| VFL (mm)    | 0.22           | 0.08           | -0.01         | 0.49        |             |             |               |
| VFT (mm)    | -0.21          | 0.11           | 0.42          | 0.01        | 0.16        |             |               |
| STAP1 (mm)  | 0.20           | 0.18           | 0.08          | 0.49        | 0.79*       | 0.55        |               |
| STAP2 (mm)  | 0.35           | 0.36           | 0.38          | 0.26        | 0.71        | 0.57        | 0.76*         |

672

673 *Note.* \* indicates  $p < .05$  after correcting for multiple comparisons using the Holm-Bonferroni method.

674

675

676 Table 3

677 *Pairwise Spearman correlations for weaners*

678

| Variable    | Length<br>(cm) | Weight<br>(kg) | Girth<br>(cm) | VTL<br>(mm) | VFL<br>(mm) | VFT<br>(mm) | STAP1<br>(mm) |
|-------------|----------------|----------------|---------------|-------------|-------------|-------------|---------------|
| Weight (kg) | 0.51*          |                |               |             |             |             |               |
| Girth (cm)  | 0.28           | 0.76*          |               |             |             |             |               |
| VTL (mm)    | 0.39*          | 0.48*          | 0.39*         |             |             |             |               |
| VFL (mm)    | 0.58*          | 0.64*          | 0.41*         | 0.54*       |             |             |               |
| VFT (mm)    | 0.16           | 0.48*          | 0.50*         | 0.22        | 0.34        |             |               |
| STAP1 (mm)  | 0.38*          | 0.61*          | 0.38*         | 0.46*       | 0.67*       | 0.47*       |               |
| STAP2 (mm)  | 0.32           | 0.48*          | 0.31          | 0.47*       | 0.57*       | 0.30        | 0.66*         |

679

680 *Note.* \* indicates  $p < .05$  after correcting for multiple comparisons using the Holm-Bonferroni method.

681

682

683 Table 4

684

685 *GLM estimates for vocal tract length (VTL)*

686

| Effect           | Estimate | Std.Error | 2.5%    | 97.5%   | p       |
|------------------|----------|-----------|---------|---------|---------|
| Intercept        | 42.4788  | 9.2445    | 23.9898 | 60.9678 | < 0.001 |
| Age Class-Weaner | 4.6695   | 1.7801    | 1.1093  | 8.2297  | < 0.05  |
| Length           | 0.4170   | 0.1184    | 0.1802  | 0.6538  | < 0.001 |
| Weight           | 0.5933   | 0.2182    | 0.1569  | 1.0297  | < 0.01  |
| Sex-Male         | 40.7192  | 12.1685   | 16.3822 | 65.0562 | < 0.01  |
| Length*Sex-Male  | -0.4610  | 0.1379    | -0.7368 | -0.1852 | < 0.01  |

687

688 *Note.* The reference level for Age Class is ‘Pup’ and the reference level for Sex is ‘Female’.

689

690

691 Table 5

692

693 *GLM estimates for vocal fold length (VFL)*

694

| Effect                    | Estimate | Std.Error | 2.5%    | 97.5%   | p       |
|---------------------------|----------|-----------|---------|---------|---------|
| Intercept                 | 9.1651   | 3.0598    | 3.0455  | 15.2847 | < 0.01  |
| Age Class-Weaner          | -2.7492  | 3.2348    | -9.2188 | 3.7204  | 0.399   |
| Length                    | -0.0189  | 0.0396    | -0.0981 | 0.0603  | 0.635   |
| Weight                    | 0.1050   | 0.0301    | 0.0448  | 0.1652  | < 0.001 |
| Sex-Male                  | 1.0070   | 0.3670    | 0.2730  | 1.7410  | < 0.01  |
| Age Class-Weaner*Length   | 0.0562   | 0.0411    | -0.026  | 0.1384  | 0.177   |
| Age Class-Weaner*Sex-Male | -1.1833  | 0.4071    | -1.9975 | -0.3691 | < 0.01  |

695

696 *Note.* The reference level for Age Class is ‘Pup’ and the reference level for Sex is ‘Female’.

697

698

699

700 Table 6

701

702 *GLM estimates for subglottic tracheal dorsoventral distance 1 (STDV1)*

703

| Effect           | Estimate | Std.Error | 2.5%    | 97.5%   | p       |
|------------------|----------|-----------|---------|---------|---------|
| Intercept        | 15.389   | 1.6827    | 12.0236 | 18.7544 | < 0.001 |
| Age Class-Weaner | 1.7474   | 0.4352    | 0.8770  | 2.6178  | < 0.001 |
| Length           | 0.0472   | 0.0236    | 0.0000  | 0.0944  | < 0.05  |
| Weight           | 0.1887   | 0.0533    | 0.0821  | 0.2953  | < 0.001 |
| Sex-Male         | 0.5956   | 0.2754    | 0.0448  | 1.1464  | < 0.05  |

704

705 *Note.* The reference level for Age Class is ‘Pup’ and the reference level for Sex is ‘Female’.

706

707 Table 7

708

709 *GLM estimates for subglottic tracheal dorsoventral distance 2 (STDV2)*

710

| Effect           | Estimate | Std.Error | 2.5%    | 97.5%   | p       |
|------------------|----------|-----------|---------|---------|---------|
| Intercept        | 9.9726   | 1.8526    | 6.2674  | 13.6778 | < 0.001 |
| Age Class-Weaner | 1.5194   | 0.4792    | 0.5610  | 2.4778  | < 0.01  |
| Length           | 0.0427   | 0.0260    | -0.0093 | 0.0947  | 0.105   |
| Weight           | 0.1560   | 0.0587    | 0.0386  | 0.2734  | < 0.01  |
| Sex-Male         | 0.4523   | 0.3032    | -0.1541 | 1.0587  | 0.141   |

711

712 *Note.* The reference level for Age Class is ‘Pup’ and the reference level for Sex is ‘Female’.

713

714

715

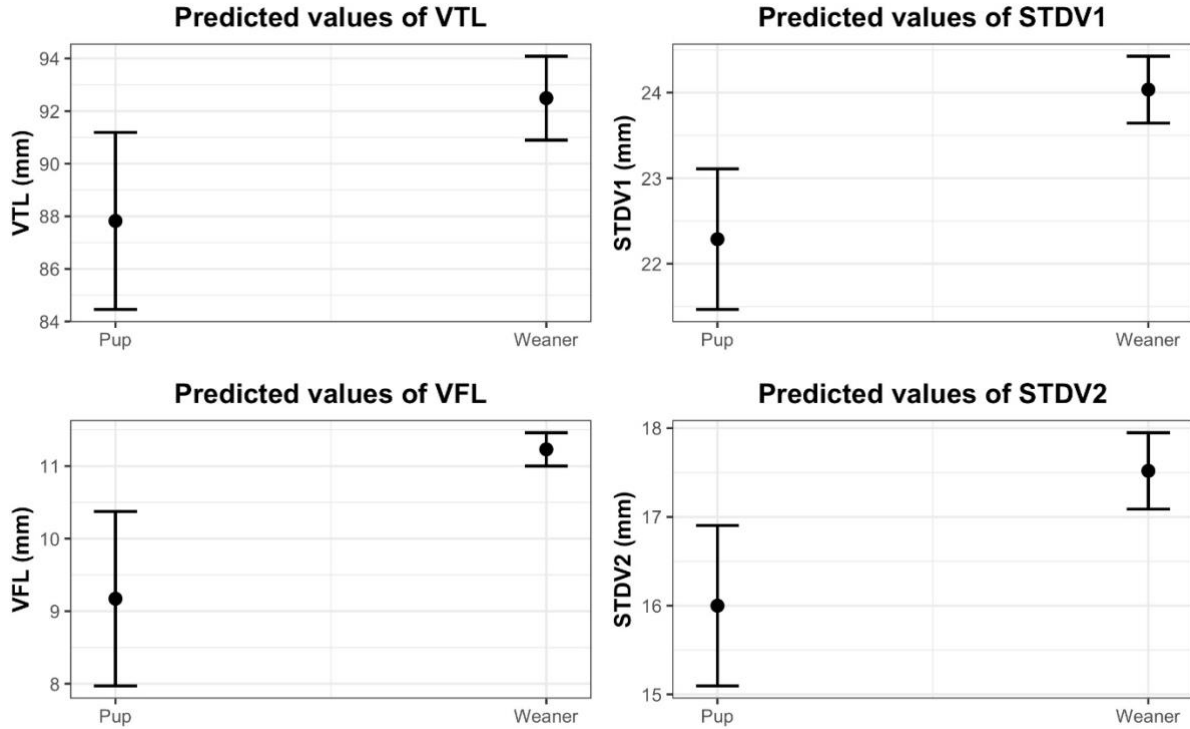

716  
717  
718  
719

**Figure 1.** Predicted effects of age class (A) in each of the GLM models.

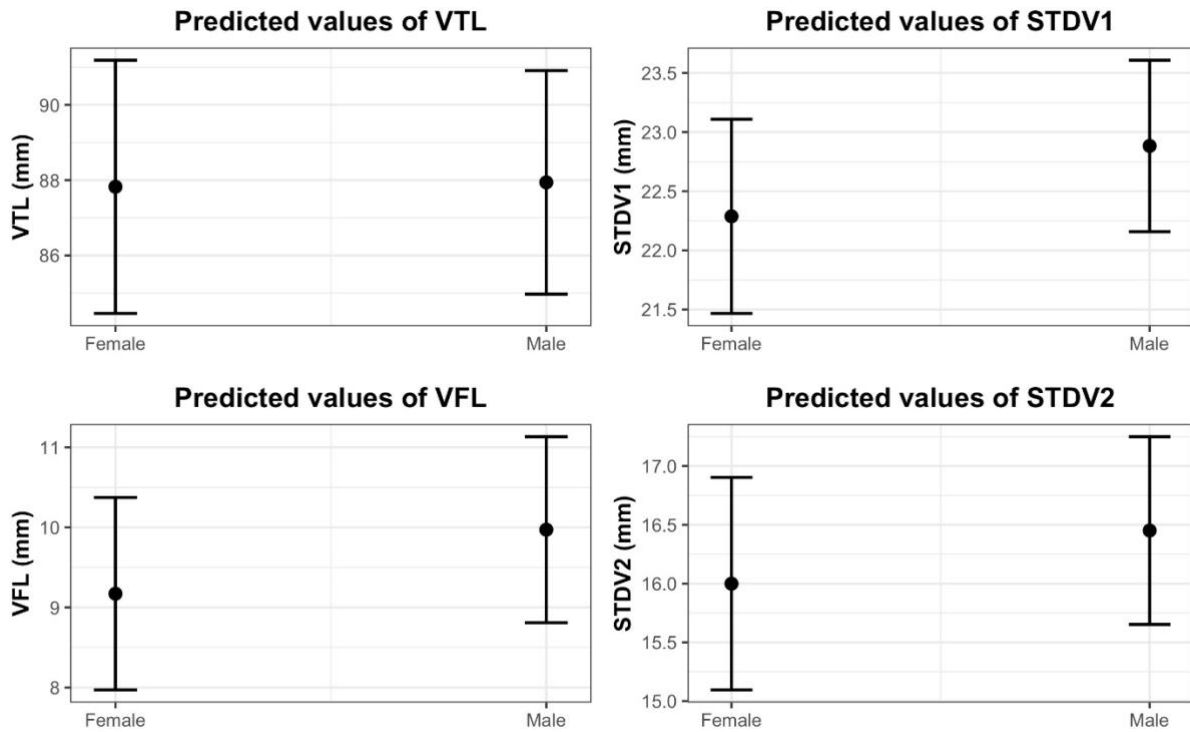

720  
721  
722

**Figure 2.** Predicted effects of sex (S) in each of the GLM models.

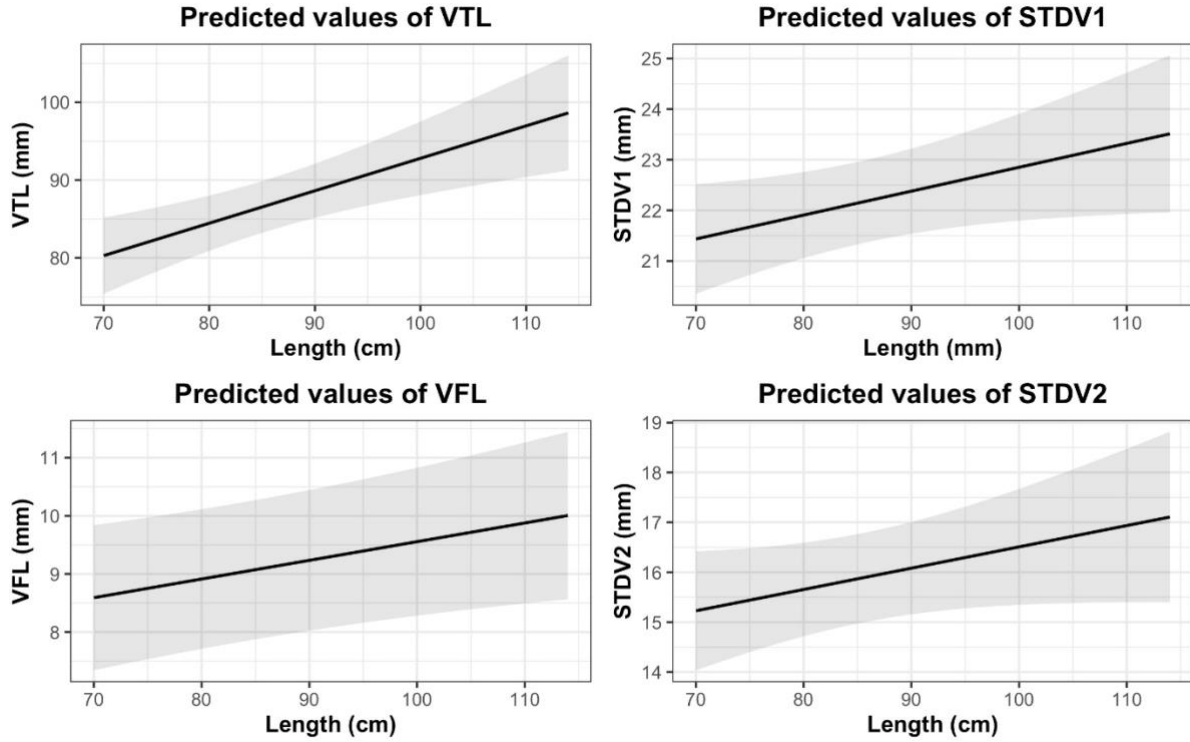

723  
724  
725  
726

**Figure 3.** Predicted effects of length (L) in each of the GLM models.

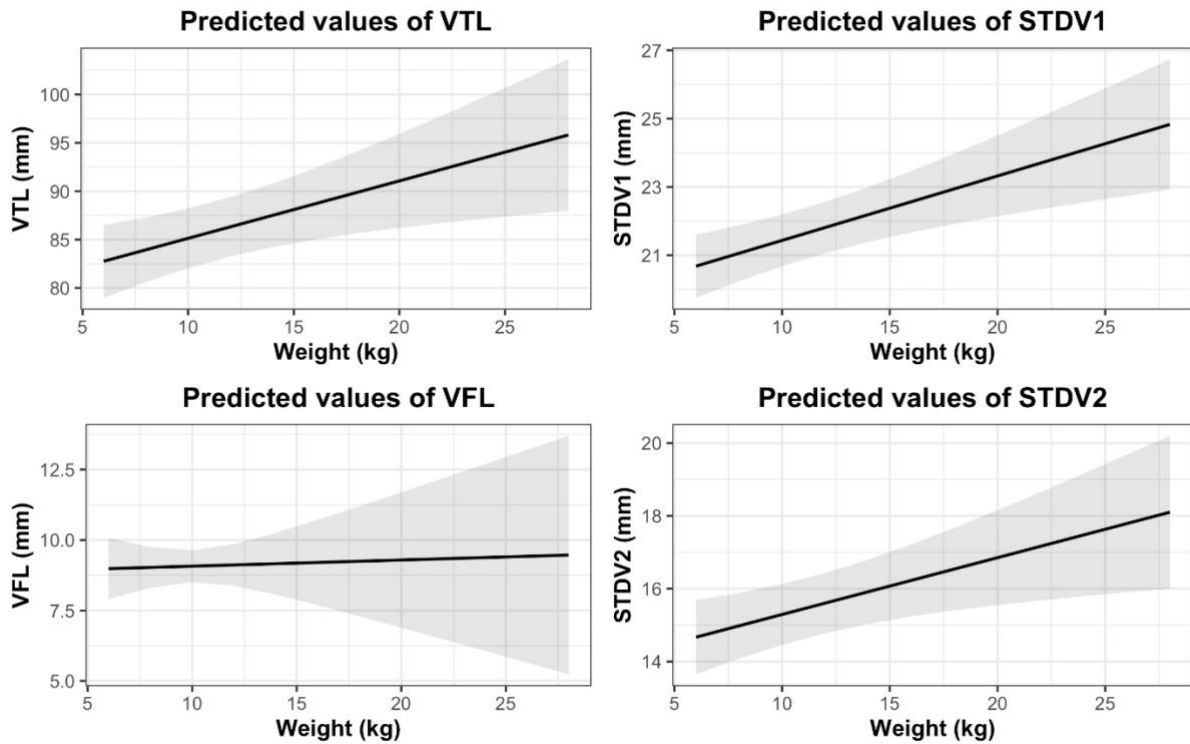

727  
728  
729

**Figure 4.** Predicted effects of weight (W) in each of the GLM models.

730

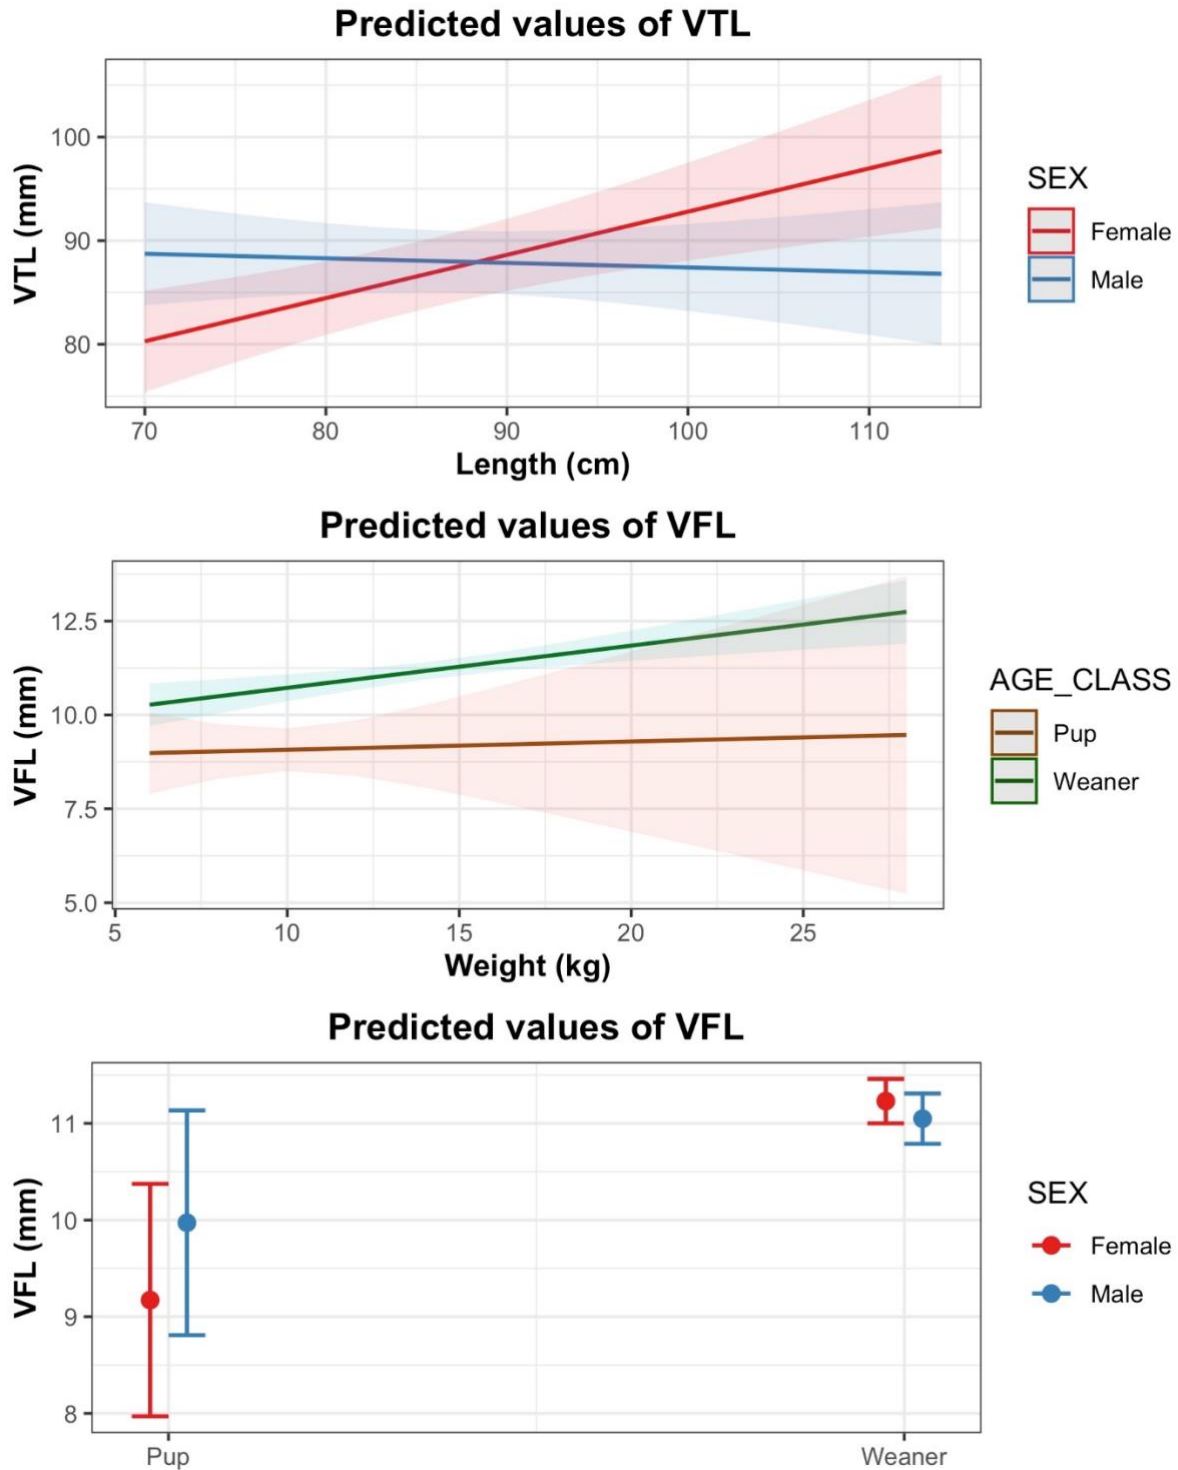

731

732

733

**Figure 5.** Predicted effects of the length and sex interaction for VTL (top), the weight and age interaction for VFL (middle) and the age and sex interaction for VFL (bottom).
